# Supplementary material for: Occurrence of RNA post-transcriptional modifications in plant viruses and viroids and their correlation with structural and functional features
Source: PubMed Central journal article supplement (PMC10194119; doi:10.1016/j.virusres.2022.198958), 2022-10-06

# Supplementary Figure 3

**A.**

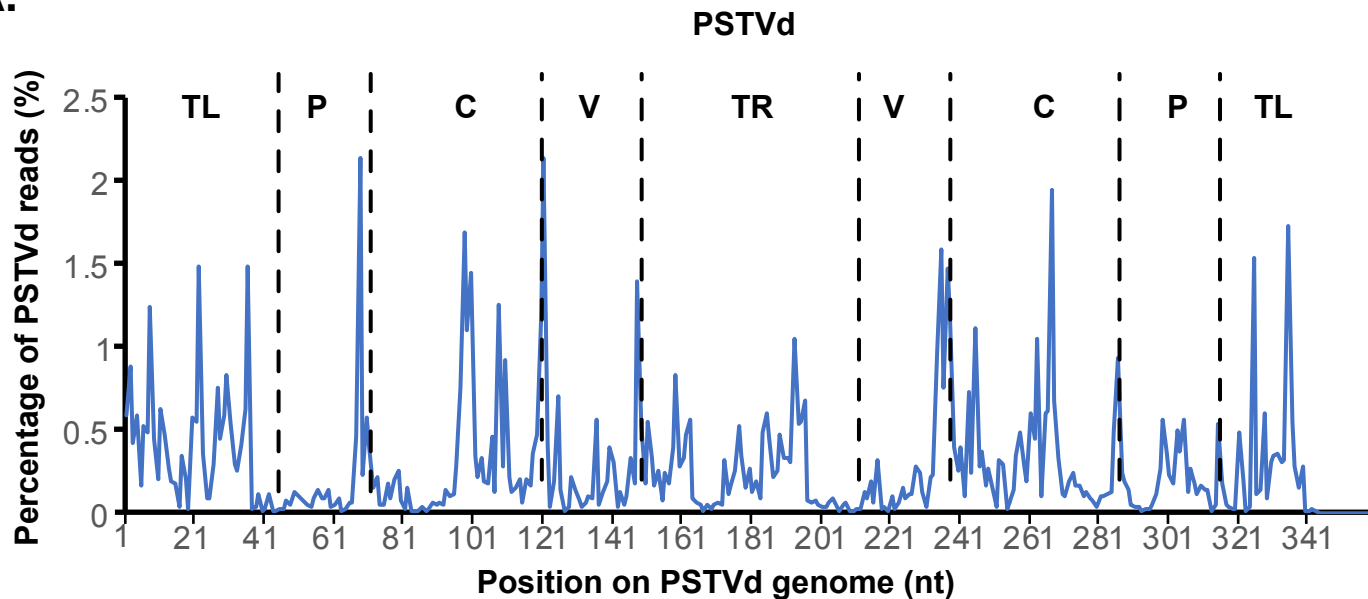

**B.**

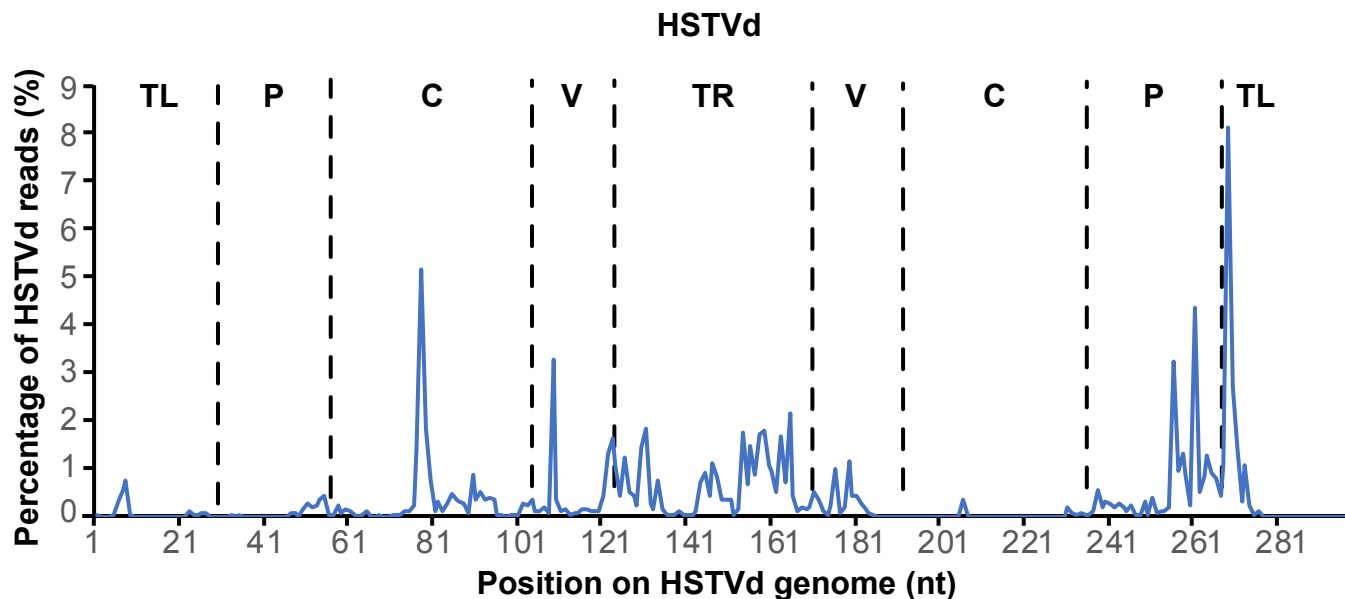

Supplement: mmc3.pdf [file mmc3.pdf]
